# Supplementary material for: Mitigation of bacterial spot disease induced biotic stress in Capsicum annuum L. cultivars via antioxidant enzymes and isoforms
Source: PubMed Central journal article supplement (PMC8093210; doi:10.1038/s41598-021-88797-1), 2021-05-03

# Mitigation of Bacterial Spot Disease Induced Biotic Stress in *Capsicum annum* L. varieties via Antioxidant Enzymes and Isoforms

Musarrat Ramzan<sup>1\*</sup>, Sundas Sana<sup>1</sup>, Nida Javed<sup>1</sup>, Anis Ali Shah<sup>2</sup>, Samina Ejaz<sup>3</sup>, Waqas Nazir Malik<sup>3</sup>, Nasim Ahmad Yasin<sup>4</sup>, Saud Alamri<sup>5</sup>, Manzer H. Siddiqui<sup>5</sup>, Rahul Datta<sup>6\*</sup>, Shah Fahad<sup>7,8\*</sup>, Nazia Tahir<sup>9,10</sup>, Ghulam Sabir Hussain<sup>11</sup>, Niaz Ahmed<sup>12</sup>, Muhammad Arif Ali<sup>12</sup>, Subhan Danish<sup>12\*</sup>

## Supplementary data for gels:

POD image results of gel electrophoresis.

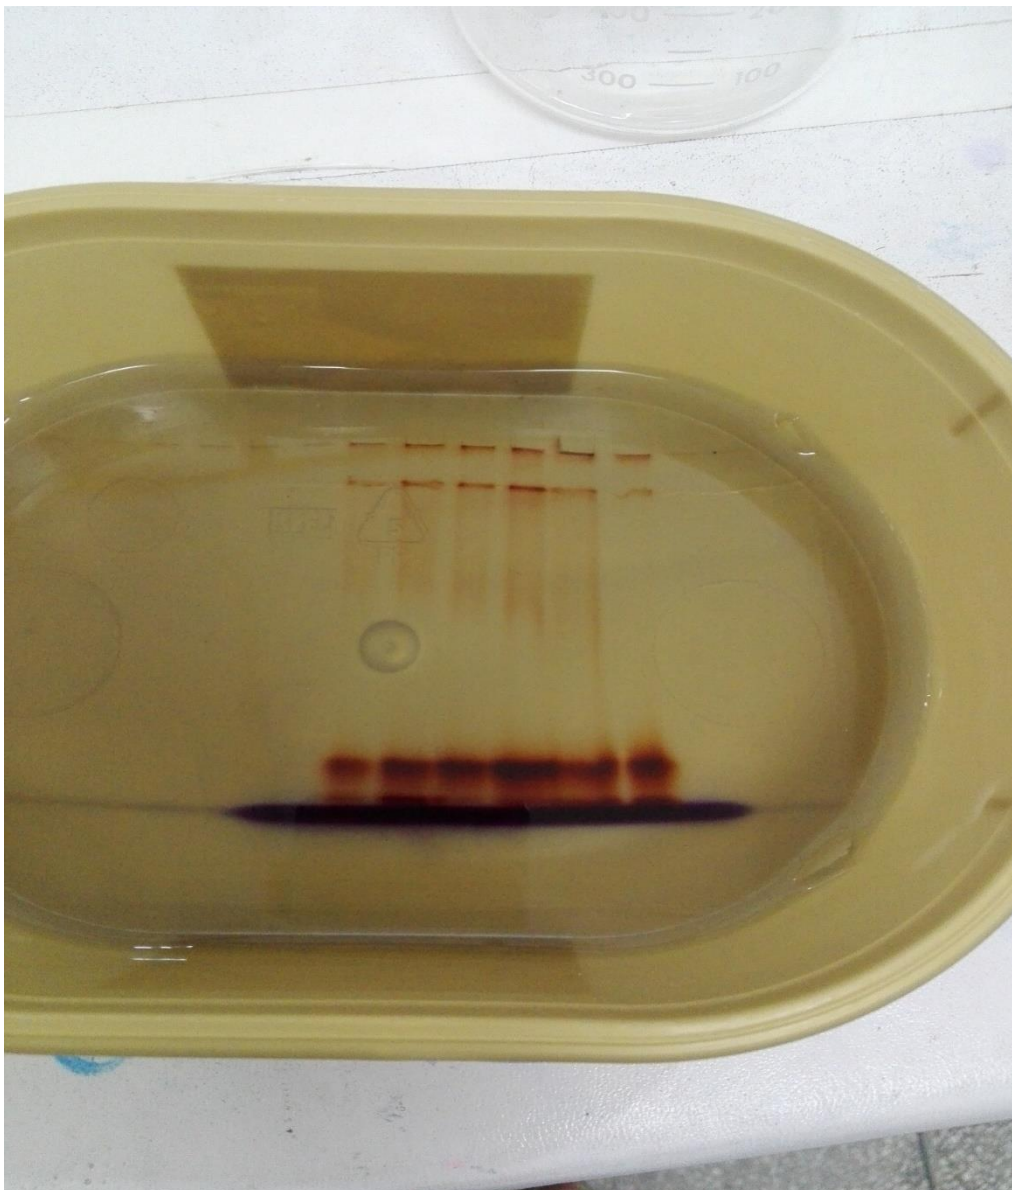

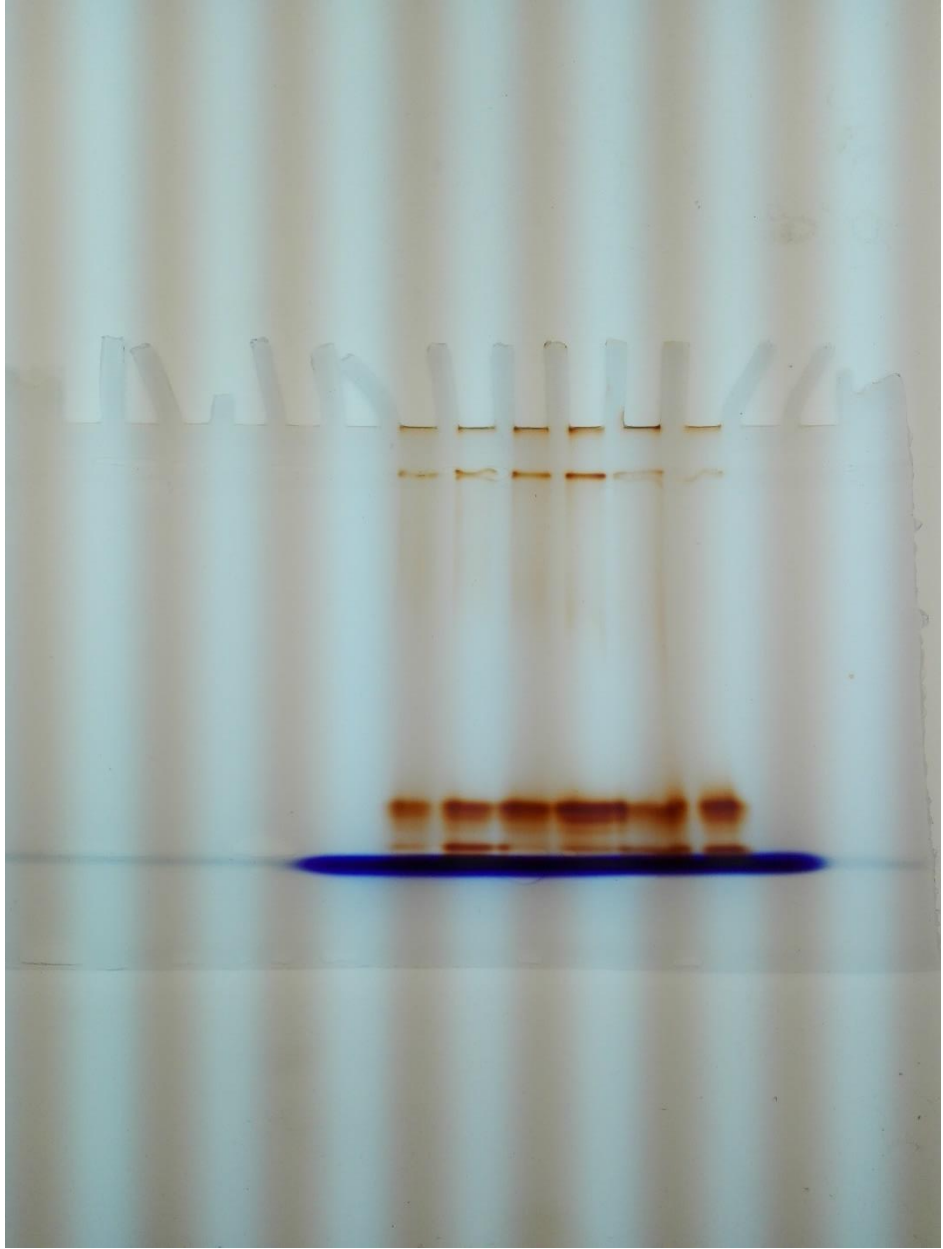

CAT image by gel electrophoresis:

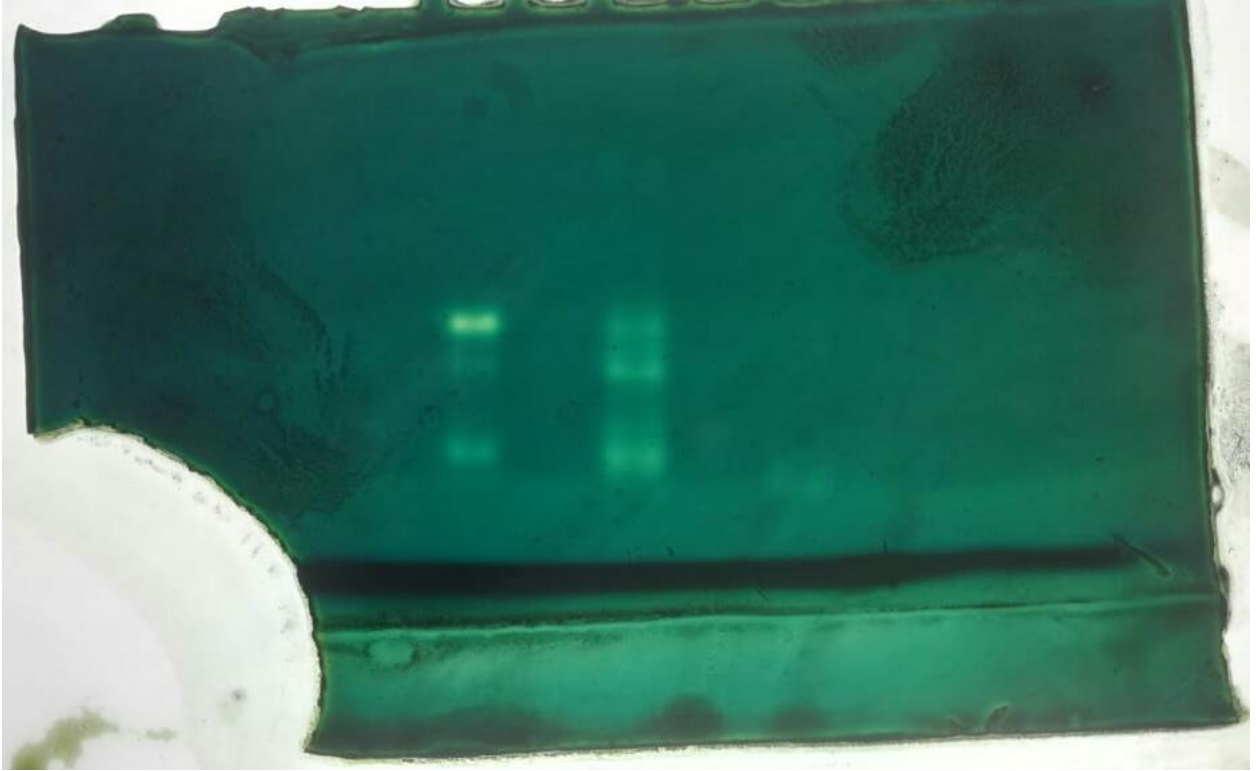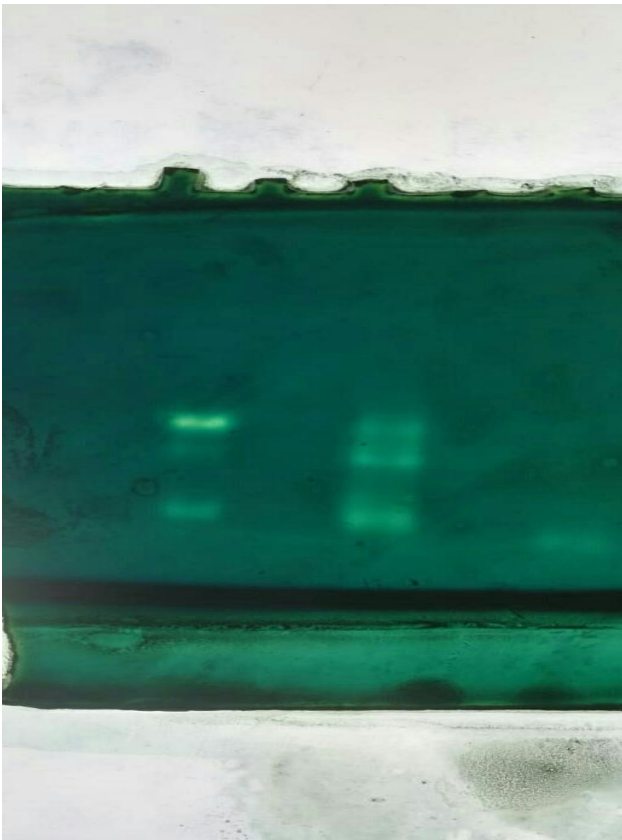

**SOD image result by gel electrophoresis:**

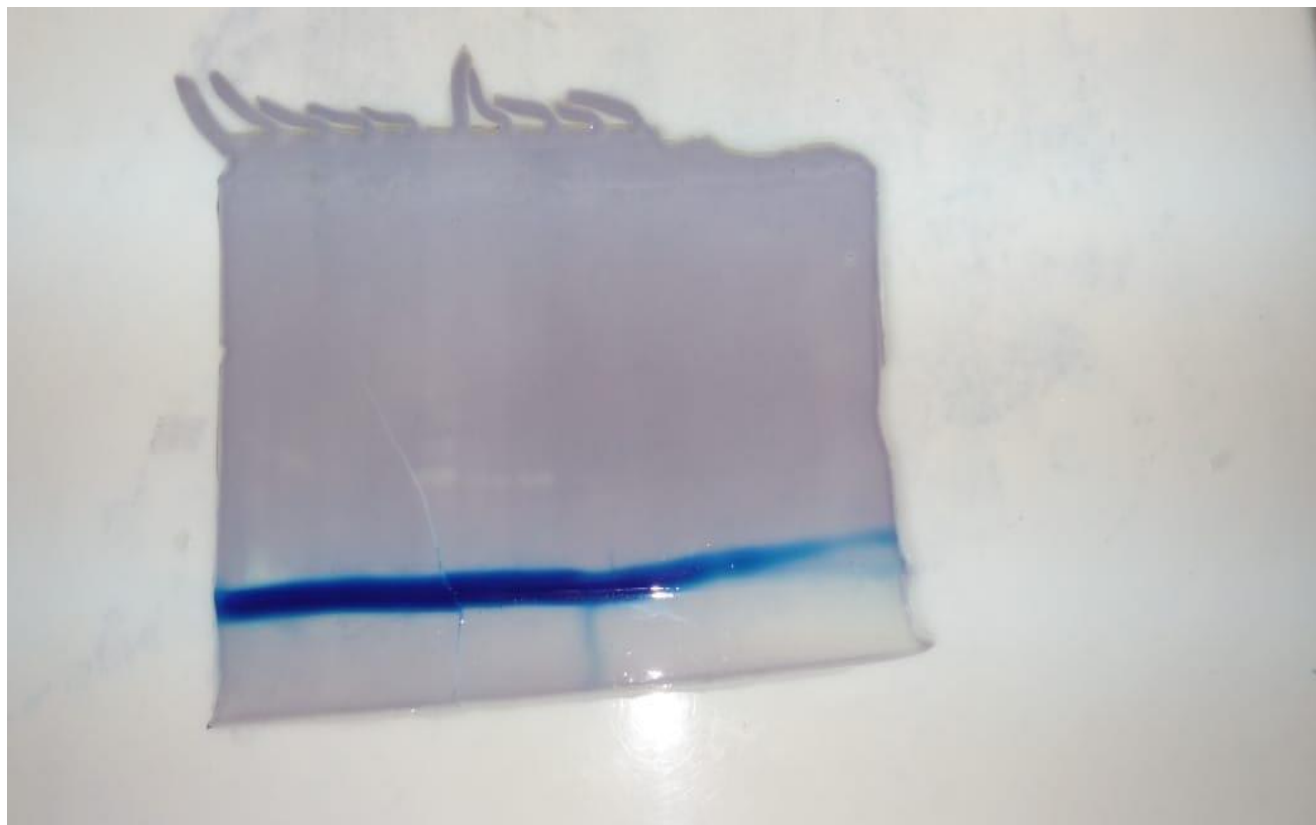

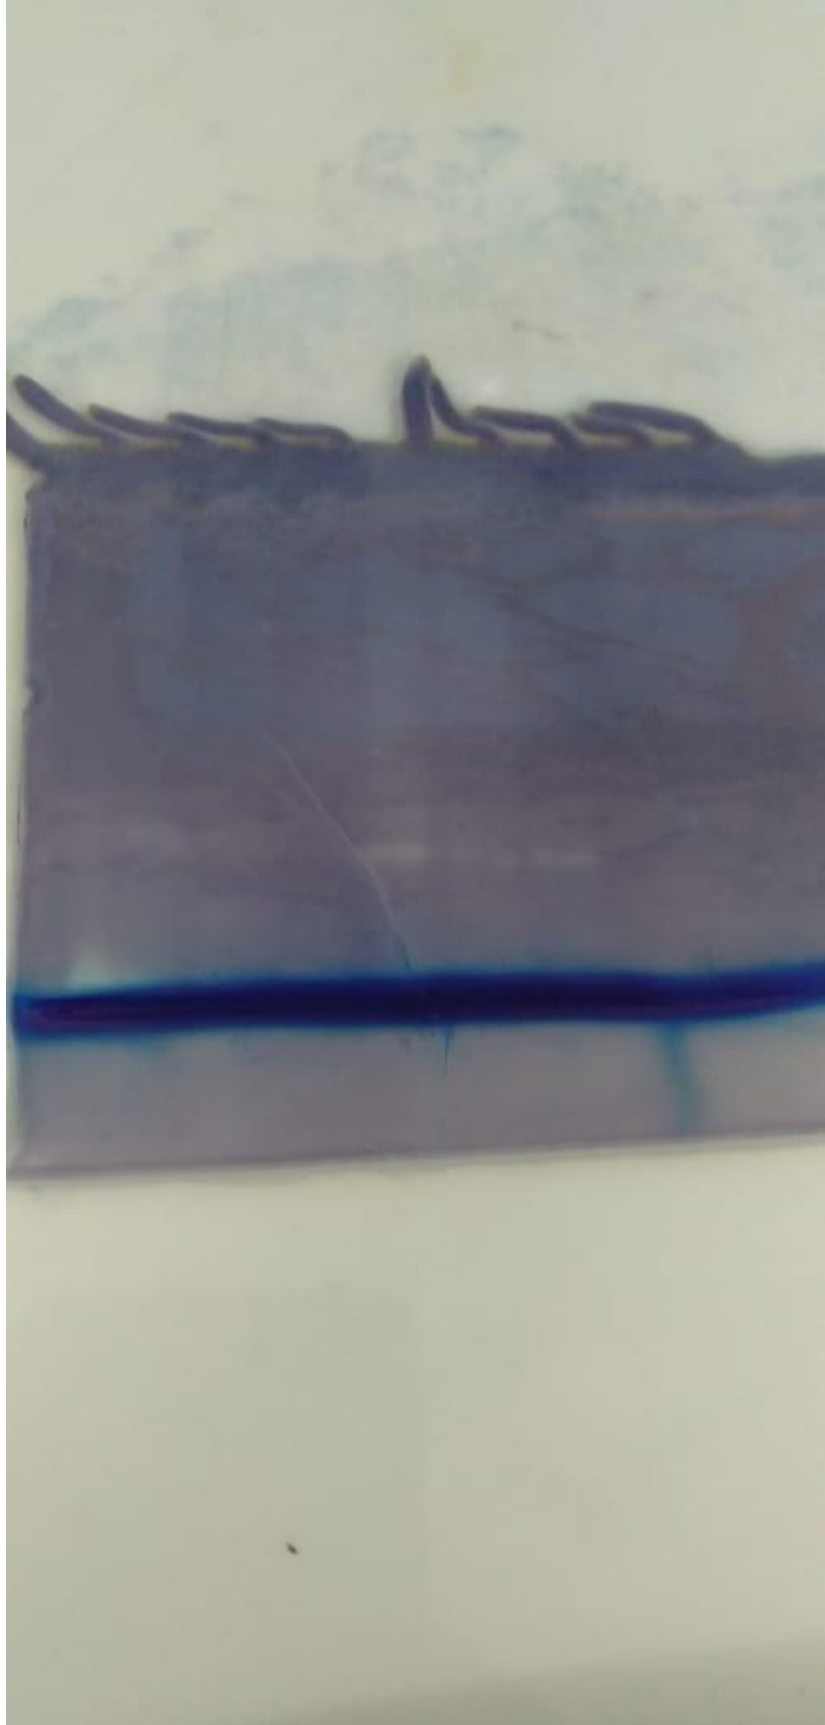

**APX image result by gel electrophoresis:**

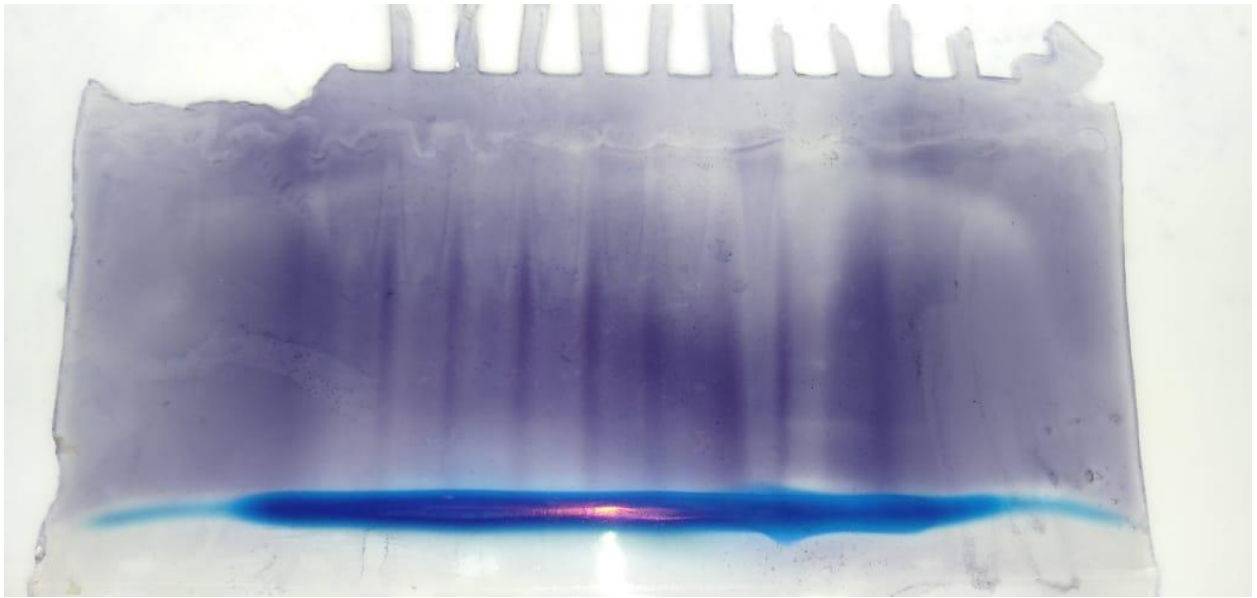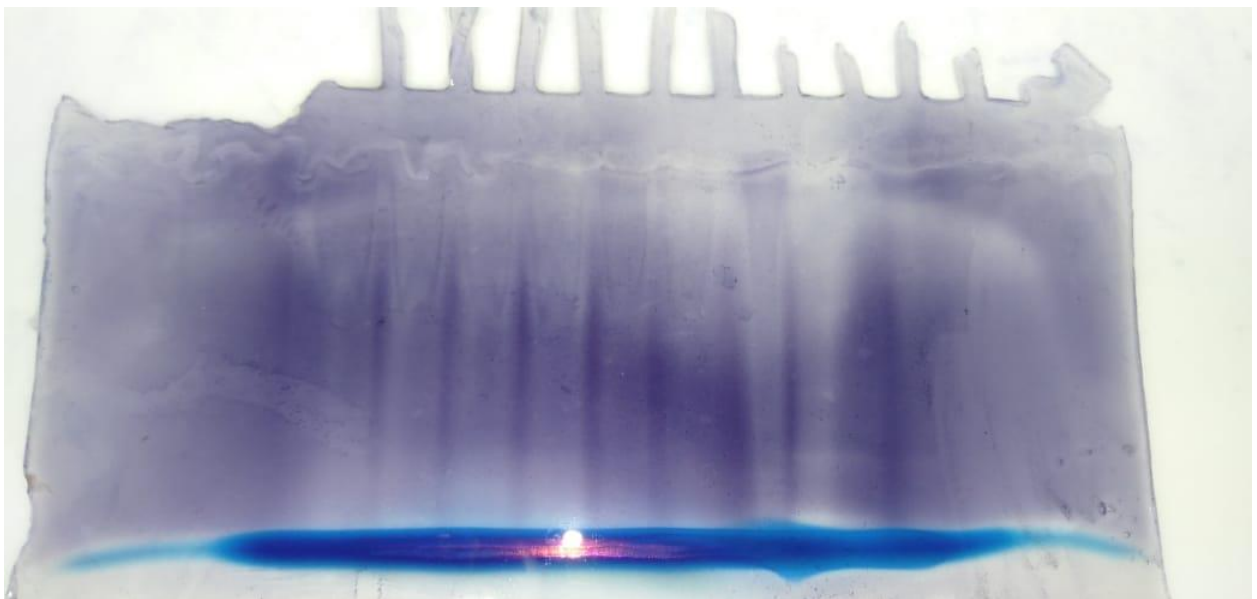

Supplement: 41598_2021_88797_MOESM1_ESM.pdf [file 41598_2021_88797_MOESM1_ESM.pdf]
